# Supplementary material
Source: PubMed Central journal article supplement (PMC6182907)
Supplement: zam020188800s1.pdf [file zam020188800s1.pdf]

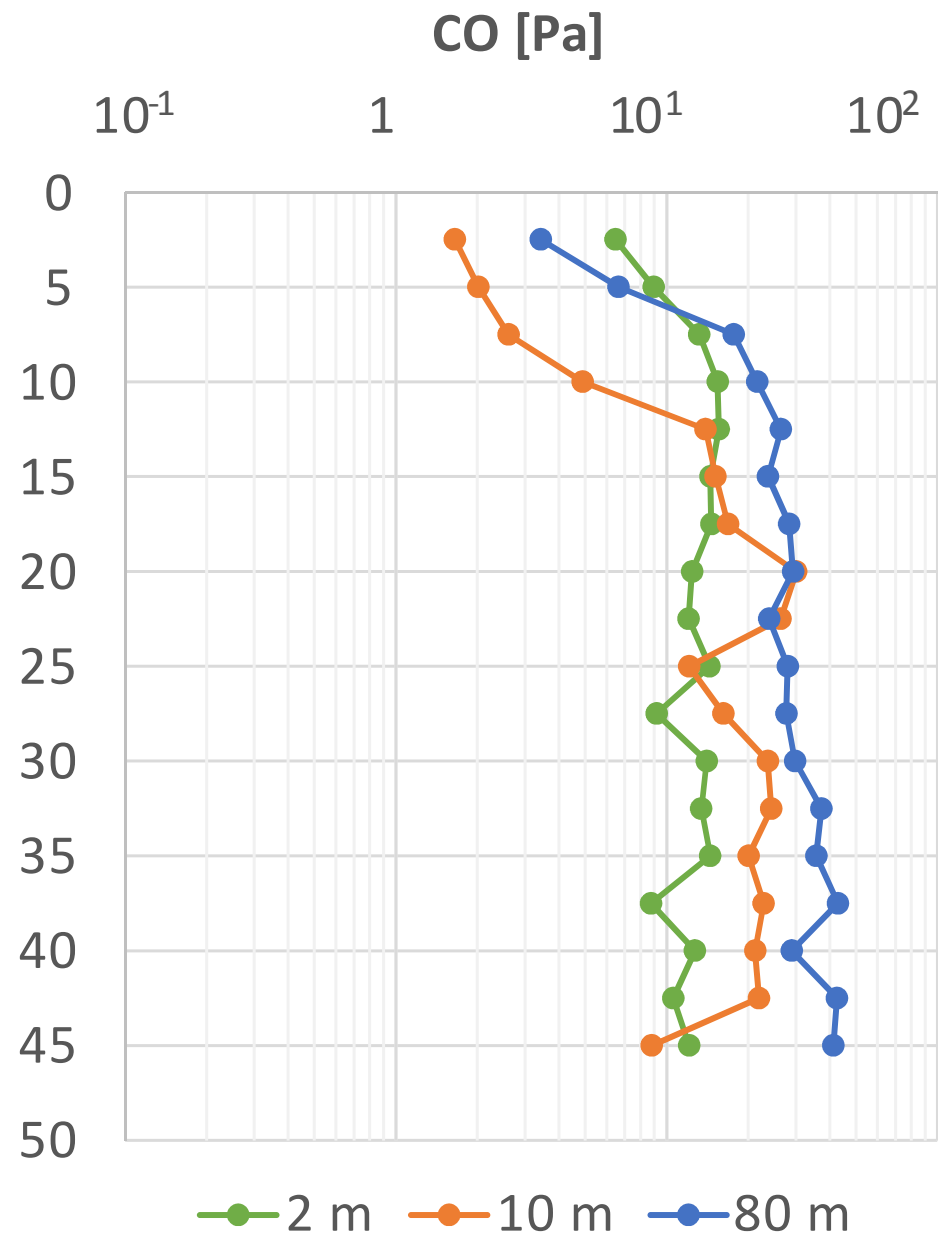

Figure S1. Carbon monoxide pools measured in sediment cores taken in Lake Constance at three different water depths (2 m, 10 m, 80 m).
